# Supplementary material for: Guidelines for collecting vouchers and tissues intended for genomic work (Smithsonian Institution): Botany Best Practices
Source: PubMed Central journal article supplement (PMC5345056; doi:10.3897/bdj.5.e11625), 2017-01-30
Supplement: bdj-05-e11625-s002.pdf [file bdj-05-e11625-s002.pdf]

**Supplemental Material 2: Example collecting sheet (from the GGI–Gardens project) showing preferred data entry fields included as part of a voucher specimen collection event**

**Collector(s):** \_\_\_\_\_

**\*Location (be specific!):** \_\_\_\_\_

Coords:

**Date collected:**

**Collecting number:**

**Number of Duplicates:**

**Accession number (or other ID):**

Family:

Genus:

Species:

**Habit (circle):**    shrub            tree            herb            climbing/vine/liana

**Height (in meters):** \_\_\_\_\_

**Phenology (circle all that apply):**    fruiting            flowering

Color of fruit/ flower: \_\_\_\_\_

Fragrance:

Stem/leaves (shape, color, margin, surface, etc):

**\*Other notes:**

**COMPLETE IN THE FIELD**

\_\_\_\_\_ Habit photograph

\_\_\_\_\_ Close-up photograph

\_\_\_\_\_ Voucher

\_\_\_\_\_ Silica

\_\_\_\_\_ Liquid Nitrogen

LN2 barcode sticker

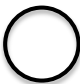

**COMPLETE AFTER RETURNING FROM FIELD**

Databased? \_\_\_\_\_

IRN # \_\_\_\_\_

Habit photo databased? \_\_\_\_\_

Close-up photo databased? \_\_\_\_\_

Silica DNA for barcoding separated? \_\_\_\_\_

Silica barcode for excel

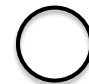

*\*Use space on reverse, if needed*
