# Supplementary material for: Guidelines for collecting vouchers and tissues intended for genomic work (Smithsonian Institution): Botany Best Practices
Source: PubMed Central journal article supplement (PMC5345056; doi:10.3897/bdj.5.e11625), 2017-01-30
Supplement: bdj-05-e11625-s006.pdf [file bdj-05-e11625-s006.pdf]

## Supplemental Material 6: Sources for commonly used resources

**Indicator CARDS** for measuring moisture content

[http://www.universityproducts.com/cart.php?m=product\\_list&c=1131&primary=1&parentId=&navTree%5b%5d=1131](http://www.universityproducts.com/cart.php?m=product_list&c=1131&primary=1&parentId=&navTree%5b%5d=1131) [25 cents ea. (US\$) if you order 25]

or

<http://www.sorbentsystems.com/hic.html> [14 cents ea. (US\$) if you order 500]

### **CRYOTUBES (8 ml)**

Sarstedt: <https://www.sarstedt.com/en/home/>

57x16.5 mm, polypropylene with EPDM o-ring, 8 ml sample volume; 60.542.024 (assembled and sterile); 60.542.007 (separate tubes and caps)

### **Paper coin ENVELOPS**

ULINE S-11485

<http://www.uline.com/Product/Detail/S-11485/Paper-Office-Envelopes/2-1-4-x-3-1-2-White-Coin-Envelopes>

### **Stainless Steel PAPER CLIPS (1.25 in, 3.2 cm)**

LINECO 497-2001

[http://www.lineco.com/cart.php?m=product\\_list&c=536&s=1026](http://www.lineco.com/cart.php?m=product_list&c=536&s=1026)

### **Resealable (Reclosable) POLYETHYLENE BAGS**

[http://www.uline.com/Grp\\_5/Poly-Bags-Reclosable](http://www.uline.com/Grp_5/Poly-Bags-Reclosable)

or Ziploc® from any grocery store

### **Plant PRESS and other collecting gear**

Herbarium Supply Company

P.O. Box 10966

Bozeman, MT 59719 U.S.A.

<http://herbariumsupply.com/product-category/pressing/presses/>

### **Bulk SILICA gel**

Sorbent Systems

<http://www.sorbentsystems.com/bulksorbents.html>

640SGO55, Orange indicating silica gel, 2-4mm bead, 55 lb drum

639AG55BG, White Silica Gel, 2-4mm bead, 55 lb drum

or

AGM Container Controls, Inc

<http://www.agmcontainer.com/products/desiccants/bulk-desiccant.html>

920010, Flower Dry Silica Gel, 0.08-0.6 mm bead (fine granular grade, blue indicator), 55 lb bag

920004, Silica gel mix, 90% white, 10% blue indicating, 2-5 mm bead, 55 lb bag

920013, Orange Indicating Silica Gel, 2-5 mm bead, 55 lb bag

### **Plastic STORAGE BOXES used in the Biorepository**

Lock & Lock USA <http://shop.locknlock-usa.com/> (sometimes out of stock) HPL836, 1.45  
Gallon container

Also from: [http://www.qvc.com/kitchen-&-food/lock-&-lock/\\_/N-lglvZ1z141jy/c.html?pageSize=ALL](http://www.qvc.com/kitchen-&-food/lock-&-lock/_/N-lglvZ1z141jy/c.html?pageSize=ALL)

**Paper TAGS: Merchandise tags (variety of colors and sizes) or METAL RIM tags**  
(variety of sizes) [http://www.uline.com/BL\\_3009/Metal-Rim-Tags](http://www.uline.com/BL_3009/Metal-Rim-Tags)
